# Supplementary material
Source: PubMed Central journal article supplement (PMC5708169)
Supplement: NIHMS907399-supplement-1.pdf [file NIHMS907399-supplement-1.pdf]

## **Biallelic *Dicer1* loss mediated by *aP2-Cre* drives angiosarcomagenesis**

Jason A. Hanna, Catherine J. Drummond, Matthew R. Garcia, Jonathan C. Go, David Finkelstein, Jerold E. Rehg, and Mark E. Hatley

### **Supplementary Information Inventory**

#### **Supplementary Tables**

Table S1. Enrichr analysis of miRNA targets in angiosarcoma.

Table S2. Antibodies used for immunohistochemistry.

Table S3. Real-time SYBR primers and PCR probes used for qRT-PCR

Table S4. Antibodies used for immunoblots.

#### **Supplementary Figures**

Figure S1. *Dicer1* deletion in adipose tissue.

Figure S2. Lung angiosarcomas in *aP2-Cre;Dicer<sup>Flox/-</sup>* mice.

Figure S3. Comparison of mouse and human angiosarcomas.

Figure S4. Interaction of miR~23~27~24 cluster with gene targets in angiosarcoma.

## Supplementary Tables

**Table S1.** Enrichr analysis of upregulated genes ( $p < 0.05$ , log ratio of  $> 2.5$ ) in angiosarcoma compared to normal aorta.

| MicroRNA                                            | P-value | Adj. P-value | Z-score | Comb. Score | Target Genes Enriched in Angiosarcoma                         |
|-----------------------------------------------------|---------|--------------|---------|-------------|---------------------------------------------------------------|
| miR-23A, miR-23B                                    | 0.0004  | 0.0365       | -1.88   | 6.21        | <i>Adam19; Wsb1; Ccnd; Plau; Sema6d; Tfp2; Ammecr1; Rail4</i> |
| miR-520A, miR-525                                   | 0.0006  | 0.0365       | -1.80   | 5.95        | <i>Plxnd1; Ube2c; Sema6d; Pgf; Apln</i>                       |
| miR-191                                             | 0.0080  | 0.2618       | -1.80   | 2.42        | <i>Ammecr1; Sox4</i>                                          |
| miR-324-3P                                          | 0.0093  | 0.2618       | -1.77   | 2.37        | <i>Adamts4; Wsb1; Plxnd1</i>                                  |
| miR-338                                             | 0.0145  | 0.3278       | -1.77   | 1.97        | <i>Wsb1; Ccnd1; Sema6d</i>                                    |
| miR-501                                             | 0.0188  | 0.3534       | -1.67   | 1.73        | <i>Ammecr1; Apold1; Sox4</i>                                  |
| miR-491                                             | 0.0307  | 0.4343       | -1.60   | 1.33        | <i>Sema6d; B4galt5</i>                                        |
| miR-224                                             | 0.0327  | 0.4343       | -1.51   | 1.26        | <i>Wsb1; Ammecr1; Kif23</i>                                   |
| miR-34A, miR-34C, miR-449                           | 0.0346  | 0.4343       | -1.48   | 1.23        | <i>Serpine1; Col12a1; Sema4c; Sox4</i>                        |
| miR-496                                             | 0.0427  | 0.4569       | -1.52   | 1.19        | <i>Sema6d; Emp1; B4galt5</i>                                  |
| miR-202                                             | 0.0445  | 0.4569       | -1.51   | 1.18        | <i>Ccnd1; Rgs16; Nid2</i>                                     |
| miR-27A, miR-27B                                    | 0.0561  | 0.5280       | -1.64   | 1.05        | <i>Adam19; Wsb1; Plxnd1; Plk2; Sema6d</i>                     |
| miR-138                                             | 0.0783  | 0.5473       | -1.51   | 0.91        | <i>Seema4c; Ammecr1; Sox4</i>                                 |
| miR-107                                             | 0.0736  | 0.5473       | -1.51   | 0.91        | <i>Ammecr1; Kif23; Rail4</i>                                  |
| miR-410                                             | 0.0645  | 0.5473       | -1.39   | 0.84        | <i>Rgs16; Rail4</i>                                           |
| miR-506                                             | 0.0973  | 0.5549       | -1.39   | 0.82        | <i>Adam19; Wsb1; Sema6d; Ammecr1; Pgf; Apln</i>               |
| miR-124A                                            | 0.0947  | 0.5549       | -1.39   | 0.82        | <i>Sema6d; Col12a1; Ccl2; Ammecr1; Rail4</i>                  |
| miR-24                                              | 0.0823  | 0.5473       | -1.35   | 0.81        | <i>Adam19; Mmp14; Ammecr1</i>                                 |
| miR-15A, miR-16, miR-15B, miR-195, miR-424, miR-497 | 0.1233  | 0.5549       | -1.31   | 0.77        | <i>Sema6d; Col12a1; Ammecr1; Kif23; Apln</i>                  |
| miR-222, miR-221                                    | 0.1276  | 0.5549       | -1.21   | 0.71        | <i>Sema6d; Ammecr1</i>                                        |

**Table S2.** Antibodies used for immunohistochemistry.

| Antibody       | Vendor         | Catalog | Dilution | Retrieval | Retrieval Buffer             | Detection                        |
|----------------|----------------|---------|----------|-----------|------------------------------|----------------------------------|
| <b>CD31</b>    | Histobiotec    | DIA-310 | 1:100    | HIER      | CC1 (Roche)                  | Omap Rat (Roche)                 |
| <b>CD34</b>    | BD Biosciences | 553731  | 1:50     | HIER      | CC1 (Roche)                  | Omap Rat (Roche)                 |
| <b>KI67</b>    | Thermo Fisher  | RM-9106 | 1:100    | HIER      | CC1 (Roche)                  | OmniMap Rabbit (Roche)           |
| <b>MECA-32</b> | BD Biosciences | 553849  | 1:50     | HIER      | Target Retrieval pH 6 (DAKO) | Rat Polymer (Biocare Medical)    |
| <b>VEGFR2</b>  | R&D Systems    | AF644   | 1:20     | HIER      | Target Retrieval pH 6 (DAKO) | Streptavidin-HRP (Thermo Fisher) |

**Table S3.** Real-time SYBR primers and PCR probes used for qRT-PCR from Applied Biosystems.

| <b>SYBR Primers</b>  |                      |                      |
|----------------------|----------------------|----------------------|
| <b>Gene</b>          | <b>Primer 1</b>      | <b>Primer 2</b>      |
| <i>Adam19</i>        | TTCTGTGTAGGCTGGAGCAA | GGAAAGCATCCACTCAGAGC |
| <i>Ammecr1</i>       | TATGCATCCACGCAGTCTTT | CACCTGTACGGATACCAGCA |
| <i>Apln</i>          | CTCGAAGTTCTGGGCTTCAC | CCTTGACTGCAGTTTGTGGA |
| <i>Aplnr</i>         | ACTGGTTGTCAGCCCCATAG | CCCATCTCTGGAAGTGGTGT |
| <i>Ccnd1</i>         | GGGTGGGTTGGAAATGAAC  | TCCTCTCCAAAATGCCAGAG |
| <i>Plau</i>          | ACAGATAAGCGGTCCTCCAG | GCCCCACTACTATGGCTCTG |
| <i>Rai14</i>         | CCTTCTCAGCATCTCCGTTT | AGCCTGAAAGCAAAGTTTCG |
| <i>Sema6d</i>        | GGCCAAGAAGAAATCTGAGC | CTTGTAGCCTGGAGCAGAGG |
| <i>Tfpi2</i>         | GCAAGTCTGTTGGCAGAGGT | CAGAGACCAGCAAAGTGCC  |
| <i>Wsb1</i>          | GTCAAAGGAGCTGCTGGAG  | CAGACGGTGCCCCATAGAT  |
| <b>Taqman Probes</b> |                      |                      |
| <b>Gene</b>          | <b>Assay ID</b>      |                      |
| <i>18S</i>           | 4308329              |                      |
| <i>Dicer1</i>        | Mm00521730_m1        |                      |
| miR-23a-3p           | 000399               |                      |
| miR-24-3p            | 000402               |                      |
| miR-27a-3p           | 000408               |                      |
| miR-126a-3p          | 002228               |                      |
| miR-133b-3p          | 002247               |                      |
| miR-182-5p           | 002334               |                      |
| miR-183-5p           | 002269               |                      |
| U6 snRNA             | 001973               |                      |

**Table S4.** Antibodies used for immunoblots.

| <b>Antibody</b>               | <b>Vendor</b>             | <b>Catalog</b> | <b>Dilution</b> |
|-------------------------------|---------------------------|----------------|-----------------|
| Phospho-p44/42 MAPK (ERK 1/2) | Cell Signaling Technology | 9101           | 1:1000          |
| p44/42 MAPK (ERK 1/2)         | Cell Signaling Technology | 9102           | 1:1000          |
| Phospho-AKT (Ser473)          | Cell Signaling Technology | 4060           | 1:1000          |
| AKT                           | Cell Signaling Technology | 9272           | 1:1000          |
| Phospho-S6 (Ser235/236)       | Cell Signaling Technology | 2211           | 1:1000          |
| S6 Ribosomal Protein          | Cell Signaling Technology | 2217           | 1:1000          |
| GAPDH                         | Millipore                 | MAB374         | 1:20000         |

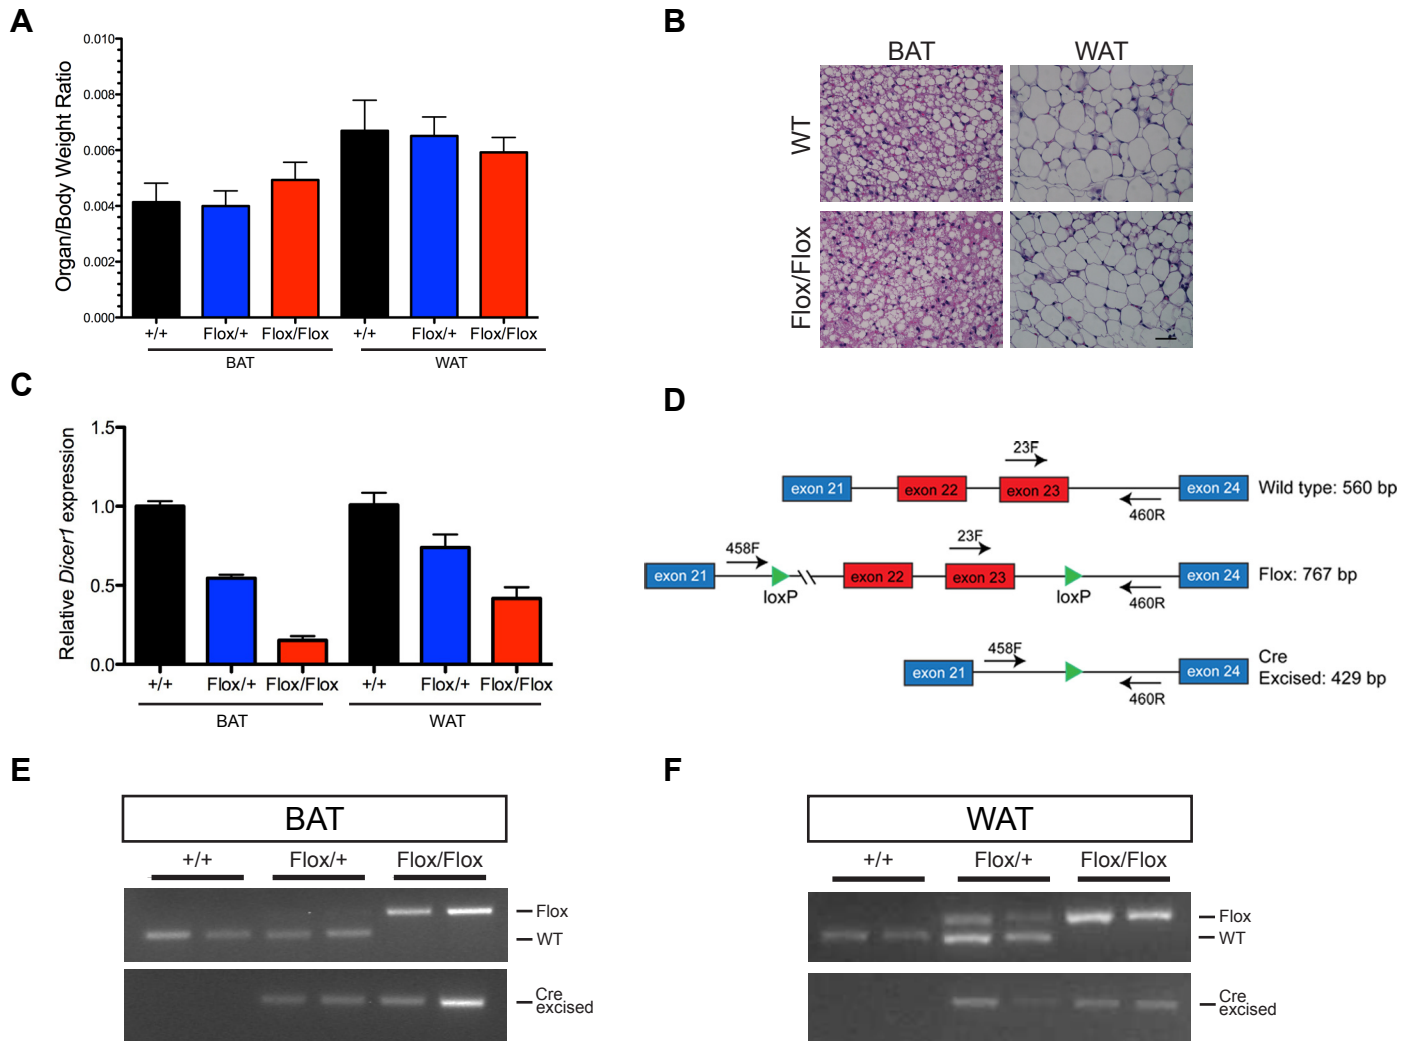

**Supplementary Figure S1. *Dicer1* deletion in adipose tissue.** (A) Interscapular brown adipose tissue (BAT) and inguinal white adipose tissue (WAT) weights relative to body weight in 24 day old  $AD^{+/+}$ ,  $AD^{Flox/+}$ , and  $AD^{Flox/Flox}$  mice ( $n = 4$ ), and  $P > 0.05$  for all comparisons. (B) BAT and WAT histology in  $AD^{+/+}$  and  $AD^{Flox/Flox}$  mice by H&E. Scale bar represents  $25 \mu\text{m}$ . (C) *Dicer1* expression by qRT-PCR in inguinal WAT and interscapular BAT from  $AD^{+/+}$ ,  $AD^{Flox/+}$ , and  $AD^{Flox/Flox}$  mice ( $n = 3$ ),  $P < 0.05$  for all BAT comparisons.  $P < 0.05$  for all WAT comparisons except  $AD^{+/+}$  compared to  $AD^{Flox/+}$ ,  $P = 0.0758$ . (D) Schematic of *Dicer1* alleles and genotyping primers to detect the Wild type, Flox, and Cre-recombined alleles. Genomic PCR for *Dicer1*<sup>Flox</sup> recombination in normal BAT (E) and WAT (F) from *AD* mice.

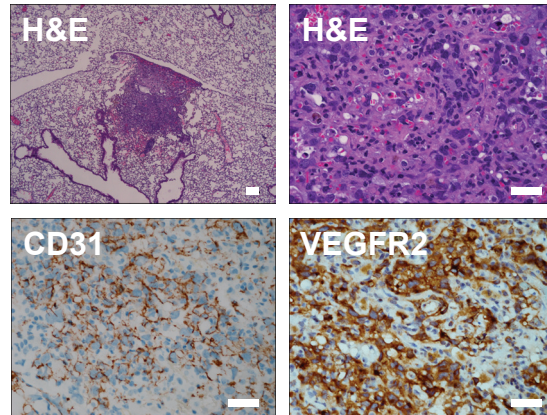

**Supplementary Figure S2. Lung angiosarcomas in *aP2-Cre;Dicer<sup>Flox/-</sup>* mice.** H&E and IHC for CD31 and VEGFR2 from lung angiosarcoma in *AD<sup>Flox/-</sup>* mice. Scale bar, 100  $\mu$ m in upper left image, otherwise 25  $\mu$ m.

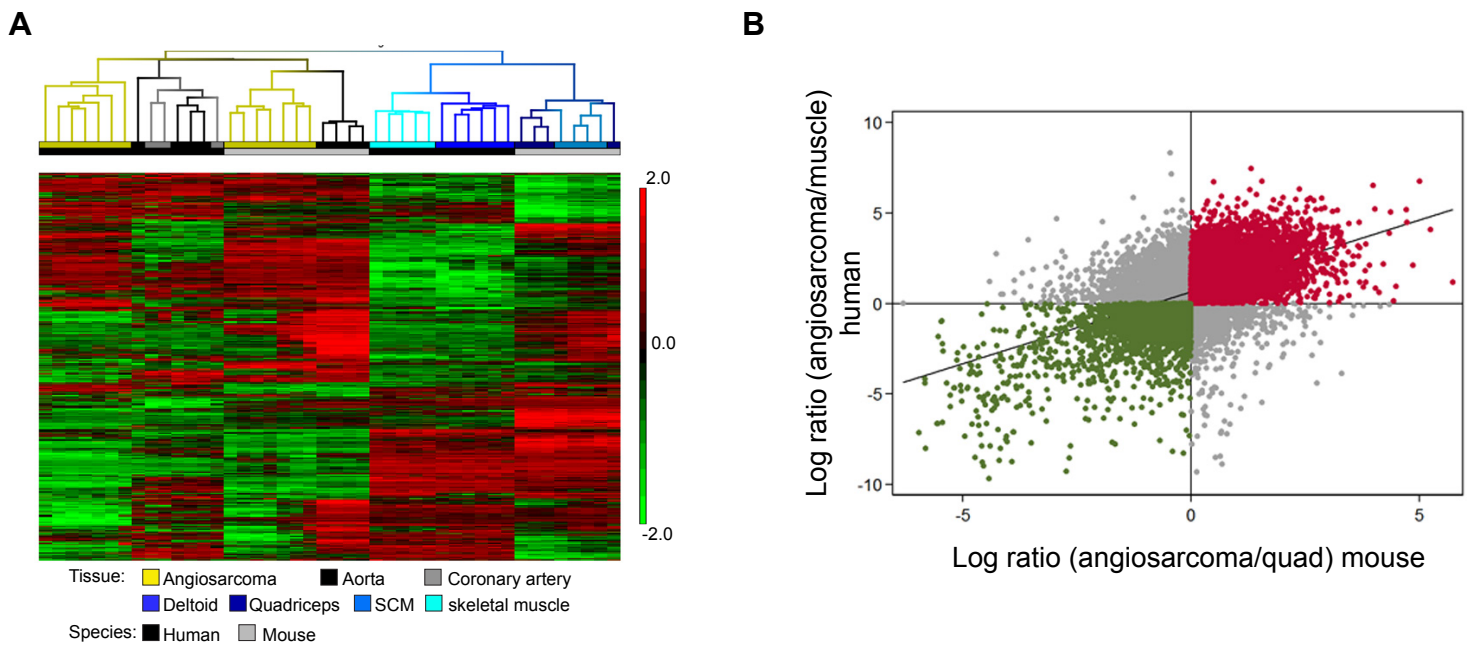

**Supplementary Figure S3. Comparison of mouse and human angiosarcomas. (A)** Unsupervised hierarchical clustering analysis; Boxes below dendrogram signify tissue type (top row) and species (bottom row, human in black and mouse in gray). Tissues displayed: angiosarcomas (yellow), skeletal muscles (blue), coronary artery (gray) and aorta (black). Each column represents a distinct sample and each row a distinct gene. **(B)** Comparison of mouse angiosarcoma (n = 7) to human angiosarcoma (n = 7) with 13,267 orthologous genes plotted and 62% agreement in genes overexpressed (red) compared to muscle and underrepresented (green). Pearson's correlation coefficient = 0.49.

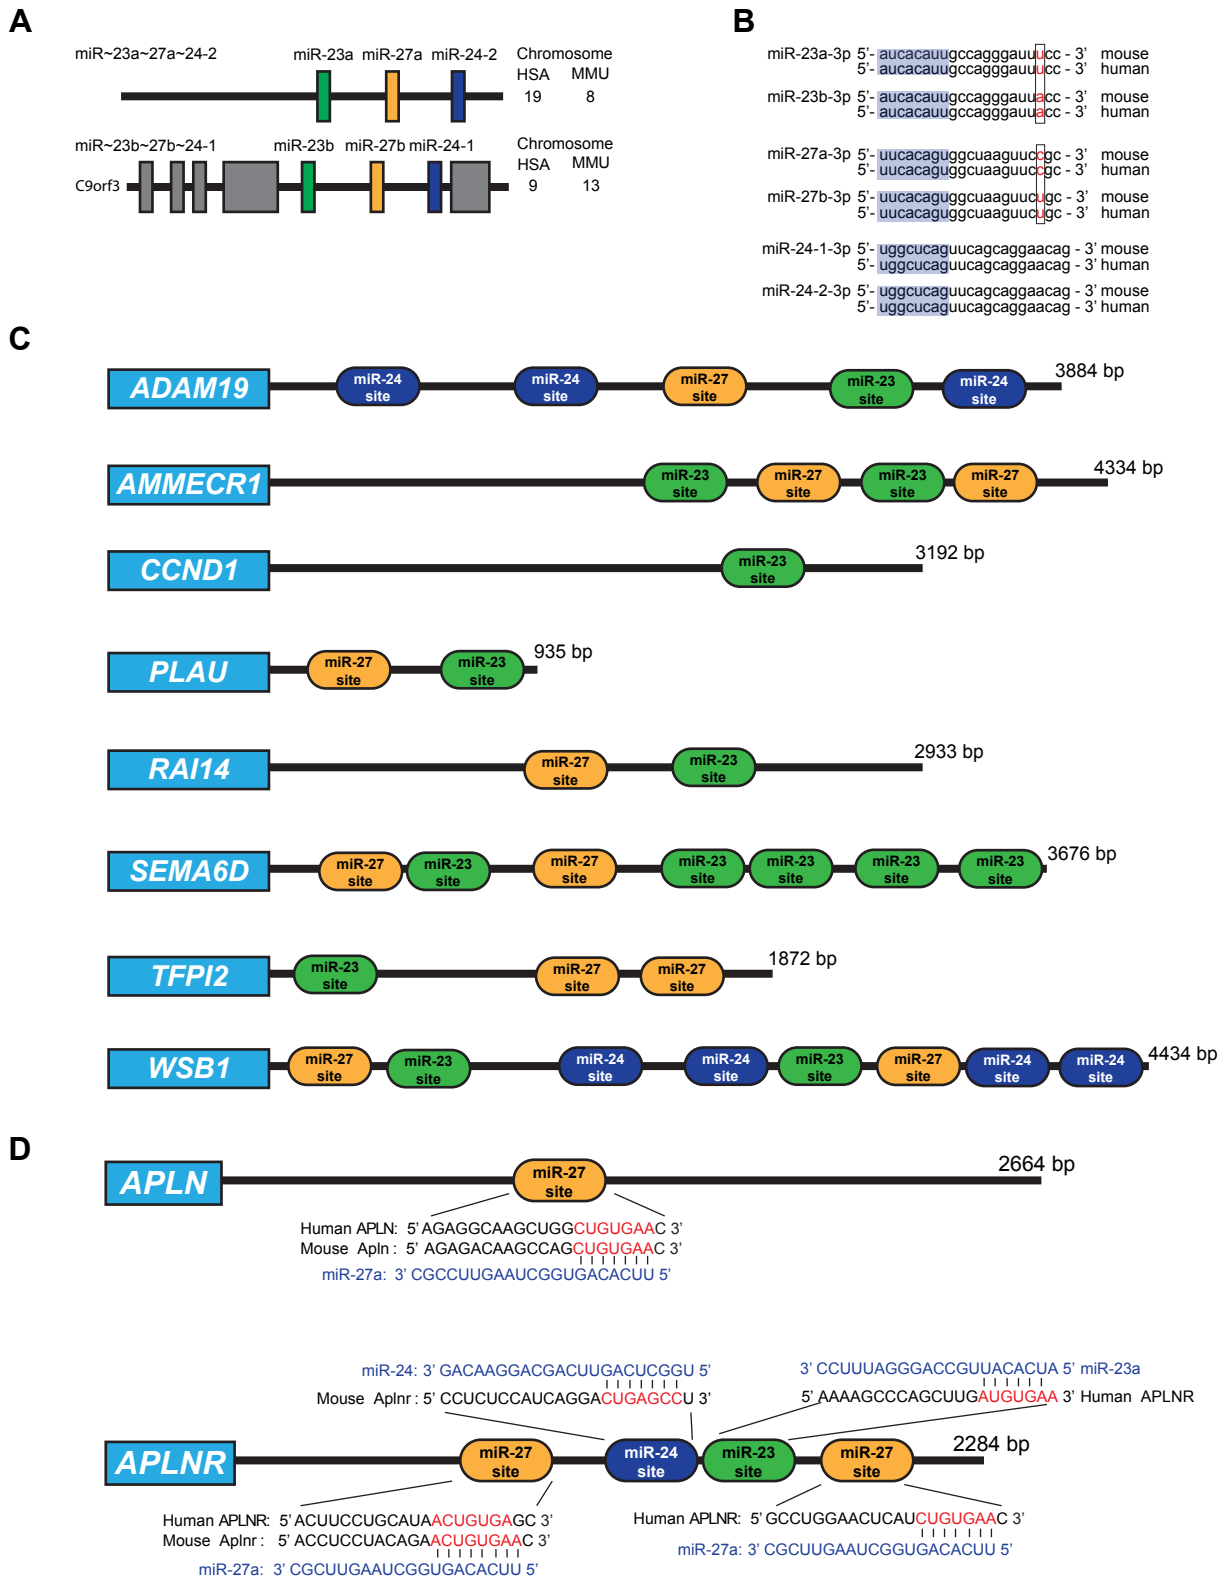

**Supplementary Figure S4. Interaction of miR~23~27~24 cluster with gene targets in angiosarcoma. (A)** Gene structure of miR~23a~27a~24-1 and miR~23b~27b~24-2 clusters showing chromosome locations in human and mouse. miR-23a/b, miR-27a/b and miR-24 are shown as colored boxes, the exons of the C9orf3 host gene of the miR-23b cluster are shown as gray boxes. **(B)** mature miRNA sequences of the miR~23~27~24 cluster miRNAs highlighting the seed sequences (blue boxes) and nucleotide differences between a and b miRNAs (red). **(C)** Schematic of miR~23~27~24 sites in genes enriched in angiosarcoma. **(D)** Schematic of miR~23~27~24 sites in the 3'UTR of APLNR and APLN.
